# Supplementary material for: Randomized comparison of the clinical outcome of single versus multiple arterial grafts: the ROMA trial—rationale and study protocol†
Source: Oxford University Press journal article supplement (doi:10.1093/ejcts/ezx358), 2017-09-14
Supplement: ezx358_supplementary_tablesrev.docx [file ezx358_supplementary_tablesrev.docx]

**Supplementary Table 1. ROMA Trial Steering Committee**

| **Name** | **Institution** |
| --- | --- |
| Mario Gaudino (PI) | Weill Cornell Medicine, New York, NY, US |
| Stephen Fremes (PI) | Sunnybrook Health Science, University of Toronto, ON, Canada |
| John H. Alexander | Duke Clinical Research Institute, Duke Health, Durham, NC, US |
| Karla Ballman | Department of Biostatistics and Epidemiology, Weill Cornell Medicine, New York, NY, US |
| Faisal G. Bakaeen | Cleveland Clinic Foundation, Cleveland, OH, US |
| Antonio Maria Calafiore | Campobasso, Italy |
| Piroze Davierwala | Herzzentrum Leipzig, Germany |
| Peter Kappetein | Thoraxcenter, Erasmus MC, Rotterdam, The Netherlands |
| Roberto Lorusso | Maastricht University Medical Centre, Maastricht, The Netherlands |
| Darren Mylotte | Galway University Hospitals, Galway, Ireland |
| Domenico Pagano | University Hospital Birmingham, UK |
| Marc Ruel | University of Ottawa Heart Institute, Ottawa, Canada |
| Thomas Schwann  David P Taggart | The University of Toledo, OH, US  University of Oxford, UK |
| Robert F. Tranbaugh | Weill Cornell Medicine, New York, NY, US |

**Supplementary Table 2. ROMA Centers**

| 1. **Cleveland Clinic Foundation, Cleveland, OH, US** |
| --- |
| 1. **Herzzentrum Leipzig, Germany** |
| 1. **Maastricht University Medical Centre, Maastricht, The Netherlands** |
| 1. **Thoraxcenter, Erasmus MC, Rotterdam, the Netherlands** |
| 1. **Sunnybrook Health Science, University of Toronto, Toronto, ON, Canada** |
| 1. **Universita’ Cattolica del Sacro Cuore, Roma, Italy** |
| 1. **University of Ottawa Heart Institute, Ottawa, Canada** |
| 1. **University of Toledo, Toledo, OH, US** |
| 1. **Weill Cornell Medicine, New York Presbyterian Hospital Brooklyn, Brooklyn, NY, US** |
| 1. **Weill Cornell Medicine, New York Presbyterian Hospital Manhattan, New York, NY, US** |
| 1. *Anthea Hospital, Bari, GVM Care and Research, Italy* |
| 1. *Azienda Ospedaliera di Perugia, Italy* |
| 1. *Bad Oeynhausen Hospital, Germany* |
| 1. *Department of Cardiac Surgery, Innsbruck Medical University, Innsbruck, Austria* |
| 1. *European Hospital, Roma, Italy* |
| 1. *Fondazione Poliambulanza, Brescia, Italy* |
| 1. *Fondazione Giovanni Paolo II, Campobasso, Italy* |
| 1. *Fu-Wai Hospital, Beijing, China* |
| 1. *Golden Jubilee National Hospital, Clydebank, Glasgow, Scotland, UK* |
| 1. *Hamilton General Hospital, Hamilton, Ontario, Canada* |
| 1. *Jilin Heart Hospital, China* |
| 1. *National Taiwan University Hospital, Taiwan* |
| 1. *Ospedale Luigi Sacco, Milan, Italy* |
| 1. *Ospedale Le Molinette, Torino, Italy* |
| 1. *Praceta Mota Pinto, Coimbra, Portugal* |
| 1. *Saitama Medical University, Japan* |
| 1. *St. Michael’s Hospital,Toronto, Ontario, Canada* |
| 1. *TEDA International Cardiovascular Hospital (TICH), Tianjin, Chinese Academy of Medical Sciences & Peking Union Medical College, China* |
| 1. *Trillium Health Partners, Mississauga Hospital, Mississauga, Ontario, Canada* |
| 1. *Universitätsklinikum Gießen und Marburg GmbH, Giessen, Germany* |
| 1. *Universitäts-Herzzentrum Freiburg – Bad Krozingen, Germany* |
| 1. *Université Laval, Quebec City, Quebec, Canada* |
| 1. *University Hospitals Leuven, Belgium* |
| 1. Azienda ospedaliera San Camillo-Forlanini, Rome, Italy |
| 1. Bakulev Scientific Center for Cardiovascular Surgery, Moscow, Russia |
| 1. Campus Biomedico, Roma, Italy |
| 1. Central Clinical Hospital of the Ministry of Interior, Warsaw, Poland |
| 1. Citta’ di Lecce Hospital, GVM Care and Research, Italy |
| 1. Düsseldorf University, Düsseldorf,Germany |
| 1. Fundacardio Foundation, Valencia,Venezuela. |
| 1. Heart Institute of Pernambuco, Brasil |
| 1. Henry Dunant Hospital Center, Athens, Greece |
| 1. Hiratsuka Kyosai Heart Center, Japan |
| 1. Kurume University School of medicine, Fukuoka, Japan |
| 1. Instituto de Cirurgia cardiovascular do Oeste do Parana, Parana, Brazil |
